# Supplementary material for: Cultivar Contributes to the Beneficial Effects of Bacillus subtilis PTA-271 and Trichoderma atroviride SC1 to Protect Grapevine Against Neofusicoccum parvum
Source: PubMed Central journal article supplement (PMC8552030; doi:10.3389/fmicb.2021.726132), 2021-10-14
Supplement: Table_1.pdf [file Table_1.pdf]

**TABLE 1:** Primer sequences used for qRT-PCR analysis of defense-related genes (Trotel-Aziz et al. 2019).

| Gene         | Name                           | Accession number <sup>1</sup> | Forward Primer (5'-3')   | Reverse primer (5'-3')  | Annealing temperature (°C) | Amplicon size (bp) | Efficiency of primers pairs (%) |
|--------------|--------------------------------|-------------------------------|--------------------------|-------------------------|----------------------------|--------------------|---------------------------------|
| <i>60RSP</i> | 60S ribosomal protein L18      | XM_002270599 <sup>1</sup>     | ATCTACCTCAAGCTCCTAGTC    | CAATCTTGCCTCCTTCCT      | 60                         | 166                | 100.0                           |
| <i>EF1</i>   | elongation factor 1-alpha      | XM_002284888 <sup>1</sup>     | AACCAAAATATCCGGAGTAAAAGA | GAACTGGGTGCTTGATAGGC    | 60                         | 164                | 100.0                           |
| <i>LOX9</i>  | Lipoxygenase                   | NM_001281249 <sup>1</sup>     | CCCTTCTTGGCATCTCCCTTA    | TGTGTGTCCAGGGTCCATTC    | 60                         | 101                | 90.0                            |
| <i>PR1</i>   | pathogenesis-related protein 1 | XM_002273752 <sup>1</sup>     | GGAGTCCATTAGCACTCCTTTG   | CATAATTCTGGGCGTAGGCAG   | 60                         | 168                | 90.0                            |
| <i>PR2</i>   | Class I beta-1,3-glucanase     | NM_001280967 <sup>1</sup>     | TCAATGGCTGCAATGGTGC      | CGGTCGATGTTGCGAGATTTA   | 60                         | 155                | 97.2                            |
| <i>GST1</i>  | glutathione S-transferase      | NM_001281248 <sup>1</sup>     | TGCATGGAGGAGGAGTTCGT     | CAAGGCTATATCCCCATTTCTTC | 60                         | 98                 | 90.0                            |
| <i>PAL</i>   | phenylalanine ammonia lyase    | XM_003635637 <sup>1</sup>     | TCCTCCCGGAAAACAGCTG      | TCCTCAAATGCCTCAAATCA    | 60                         | 101                | 92.9                            |
| <i>STS</i>   | stilbene synthase              | NM_001281117 <sup>1</sup>     | AGGAAGCAGCATTGAAGGCTC    | TGCACCAGGCATTCTACACC    | 60                         | 101                | 94.3                            |

<sup>1</sup> NCBI accession number.
